# Supplementary material
Source: publisher figshare collection journal article supplement (https://future-science-group.figshare.com/ndownloader/files/33960824)

**Supplementary Figure 1. Risk of bias graph(A) and summary(B) for the studies in meta-analysis.**

**
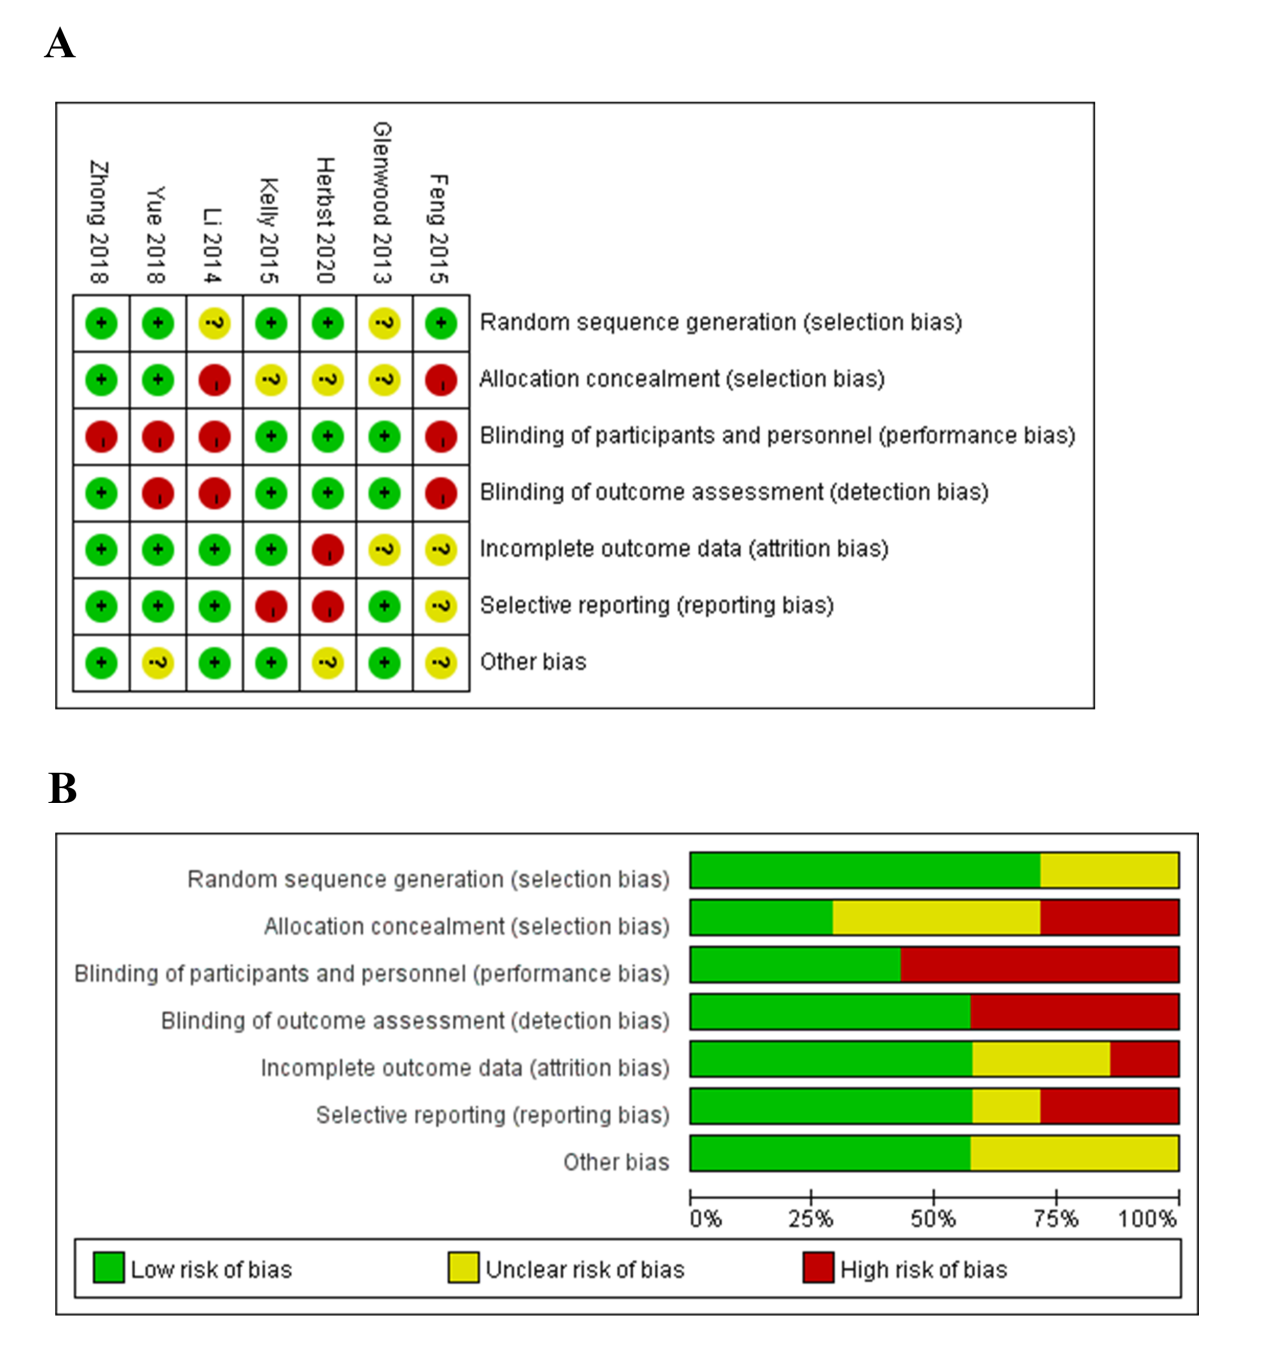
**

**Supplementary Figure 2. Funnel plot for diseases-free survival (A) and overall survival (B) evaluating potential publication bias.**


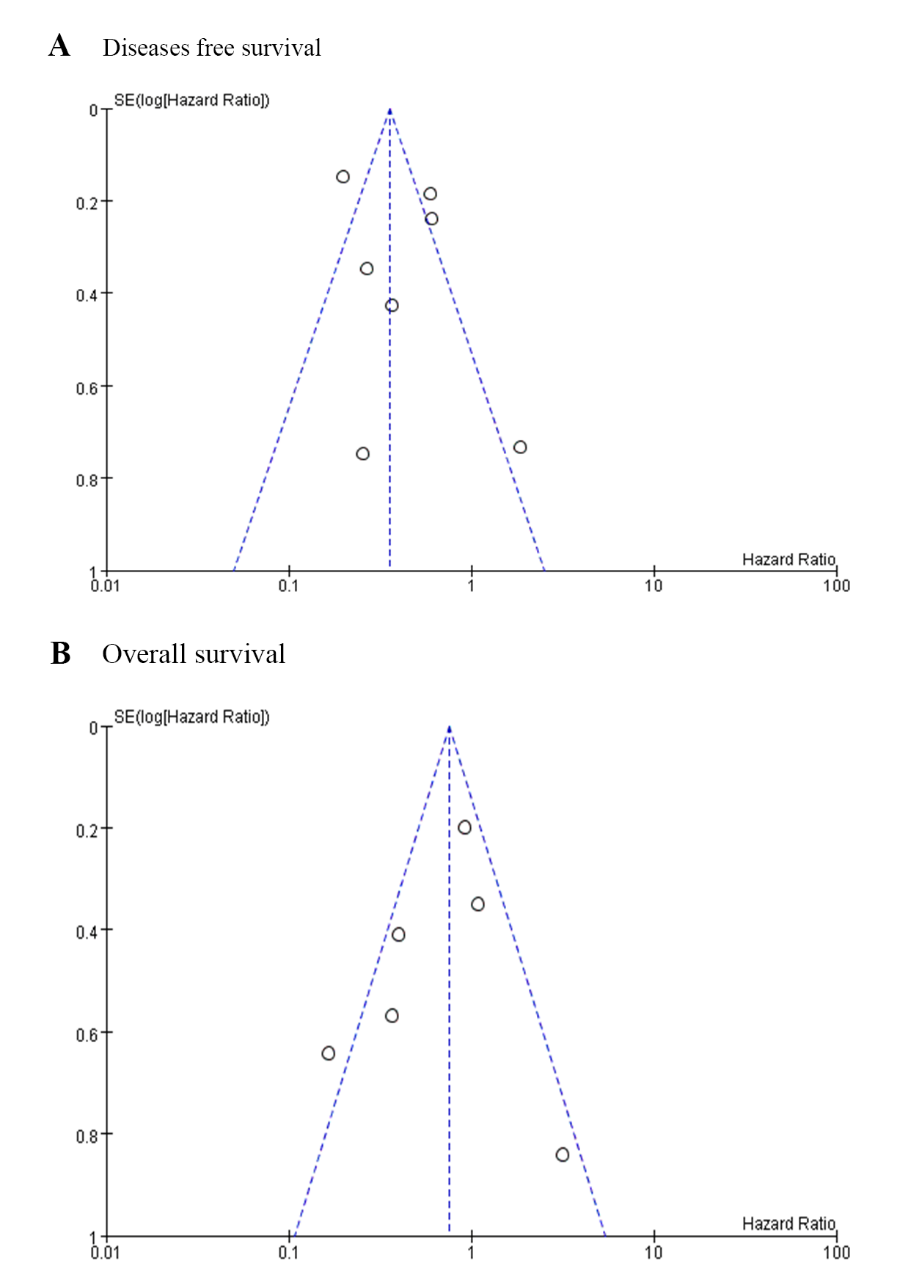

Supplement: Supplementary file 1 [file 33960824]
